# Supplementary material for: Regenerative agriculture amplifies productivity and profitability while negating greenhouse gas emissions
Source: Research Square preprint supplement (doi:10.21203/rs.3.rs-5703590/v1), 2025-01-28
Supplement: Supplementary file 1 [file c3118cbed2d25bf1b932786c.docx]

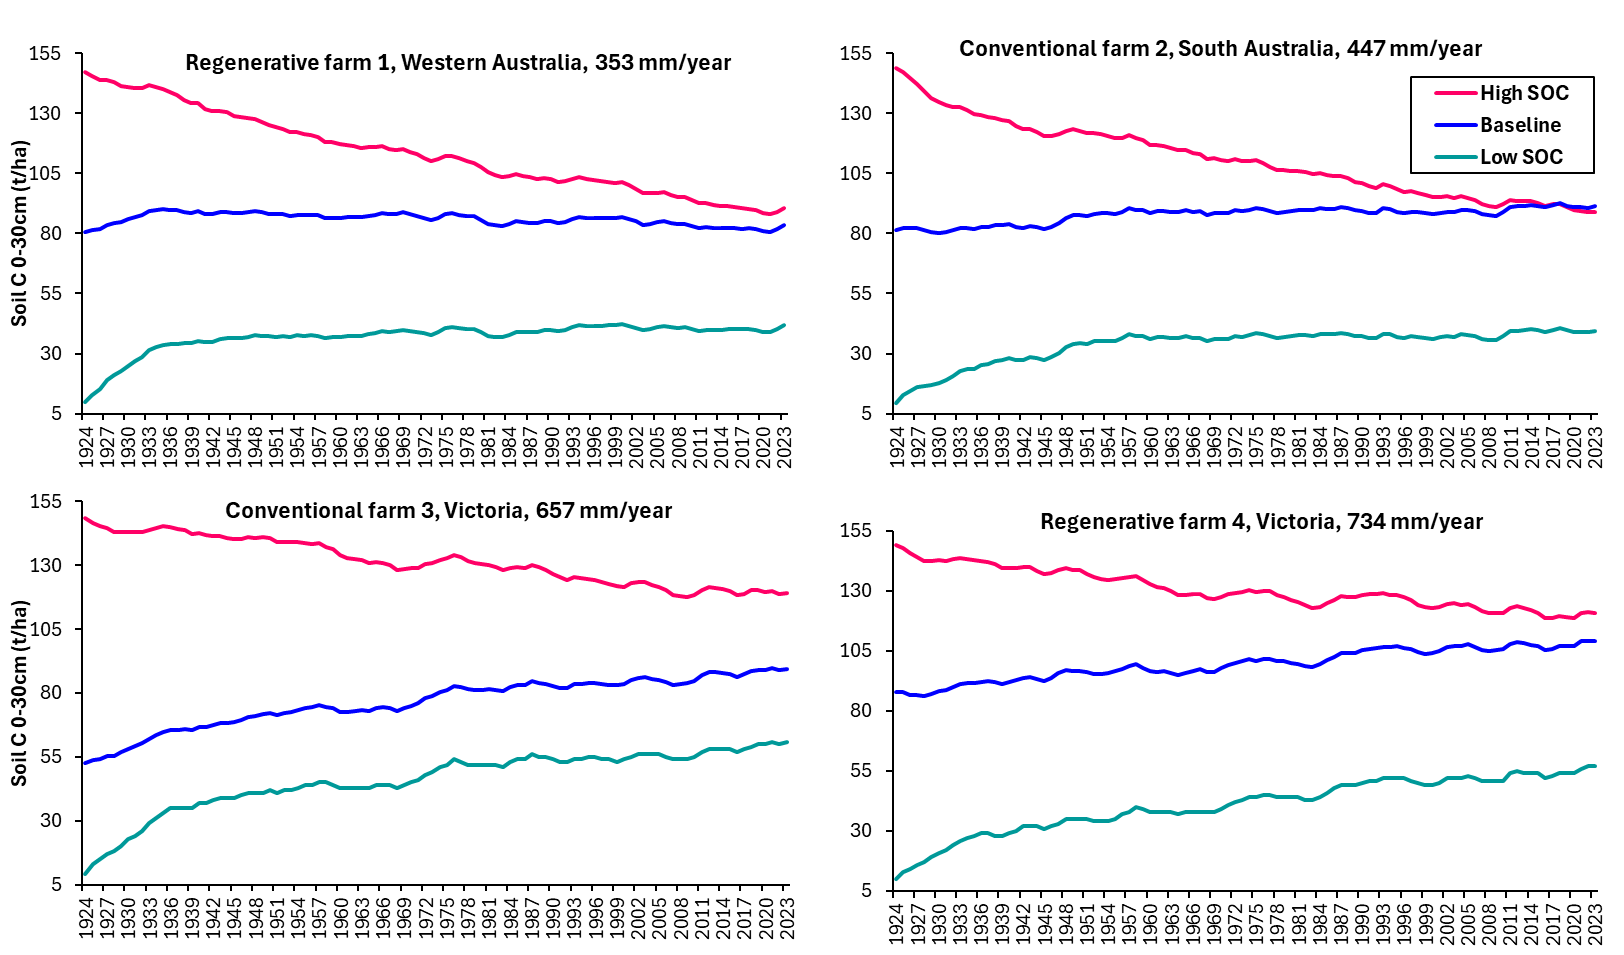


**Fig. S1.** Long-term soil organic carbon (SOC) in the soil surface (0-30 cm) for the *Baseline*, low (0.3%) and high (6%) antecedent SOC levels in four regions across southern Australia.


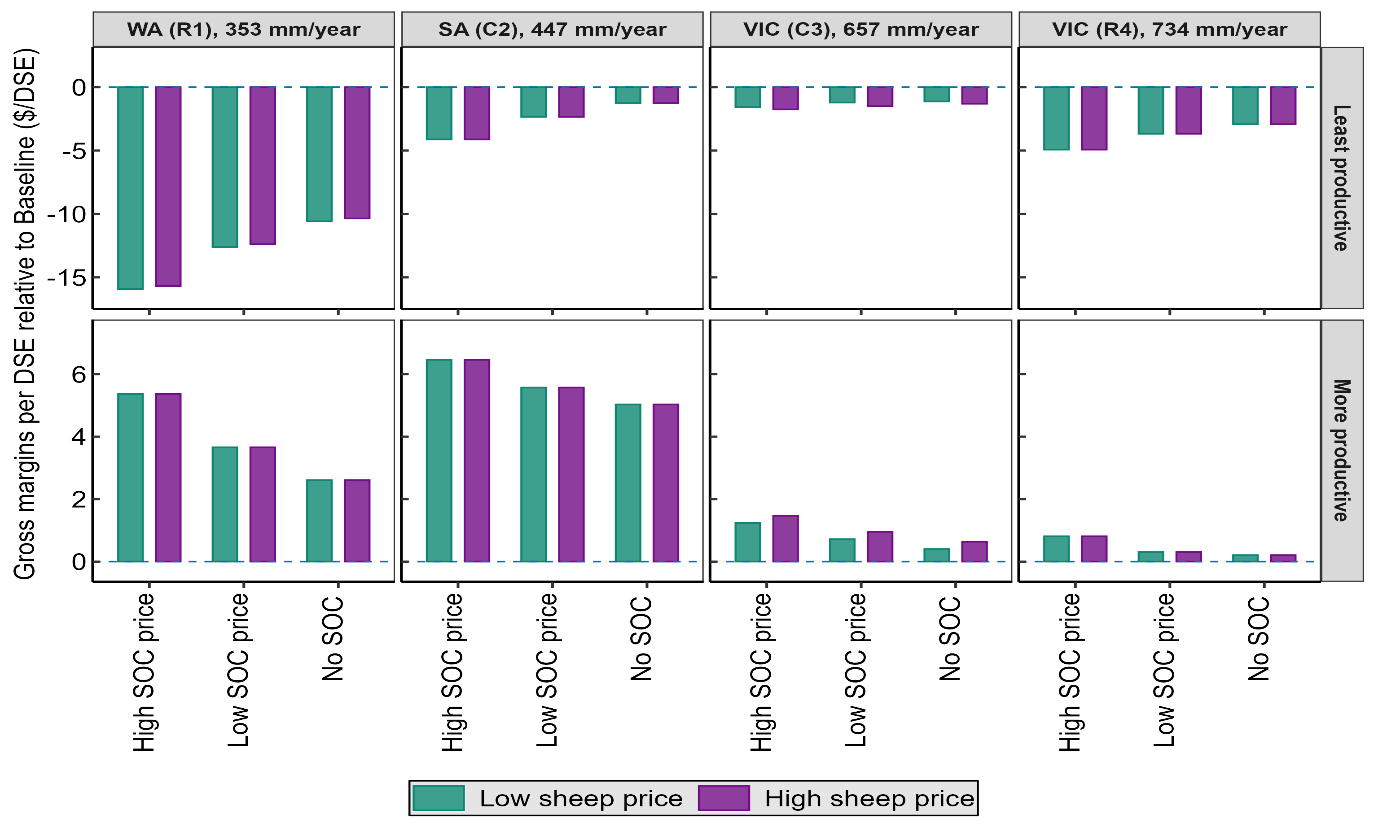


**Fig. S2.** Change in gross margins per DSE for high and low productivity botanical compositions relative to *Baseline* species across sheep and SOC prices.


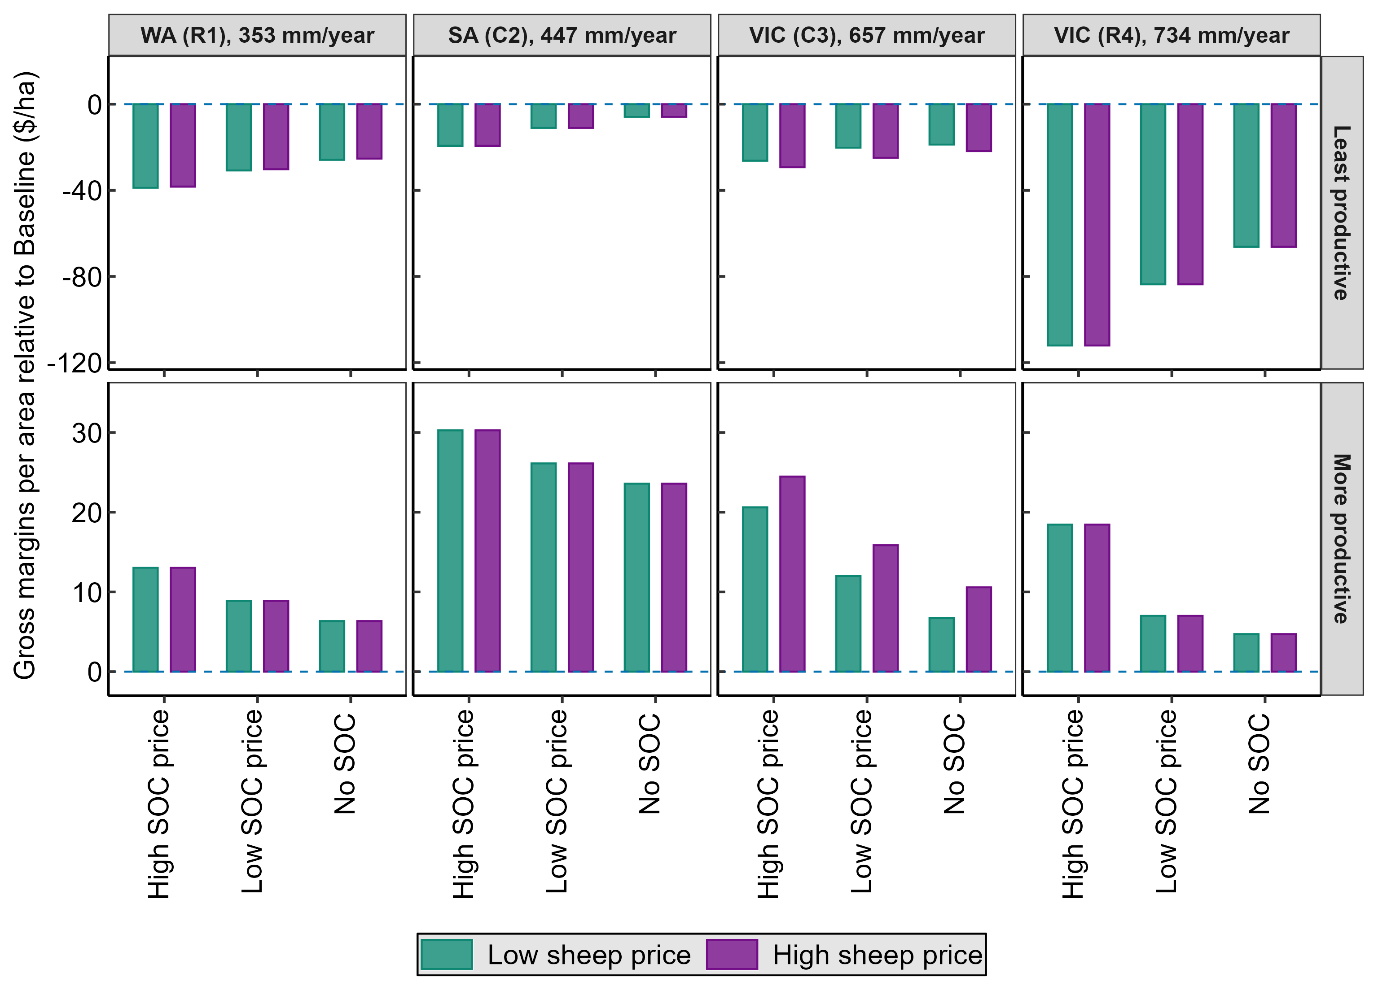


**Fig. S3.** Change in gross margins per hectare for high and low productivity botanical compositions relative to *Baseline* species across sheep and SOC prices.


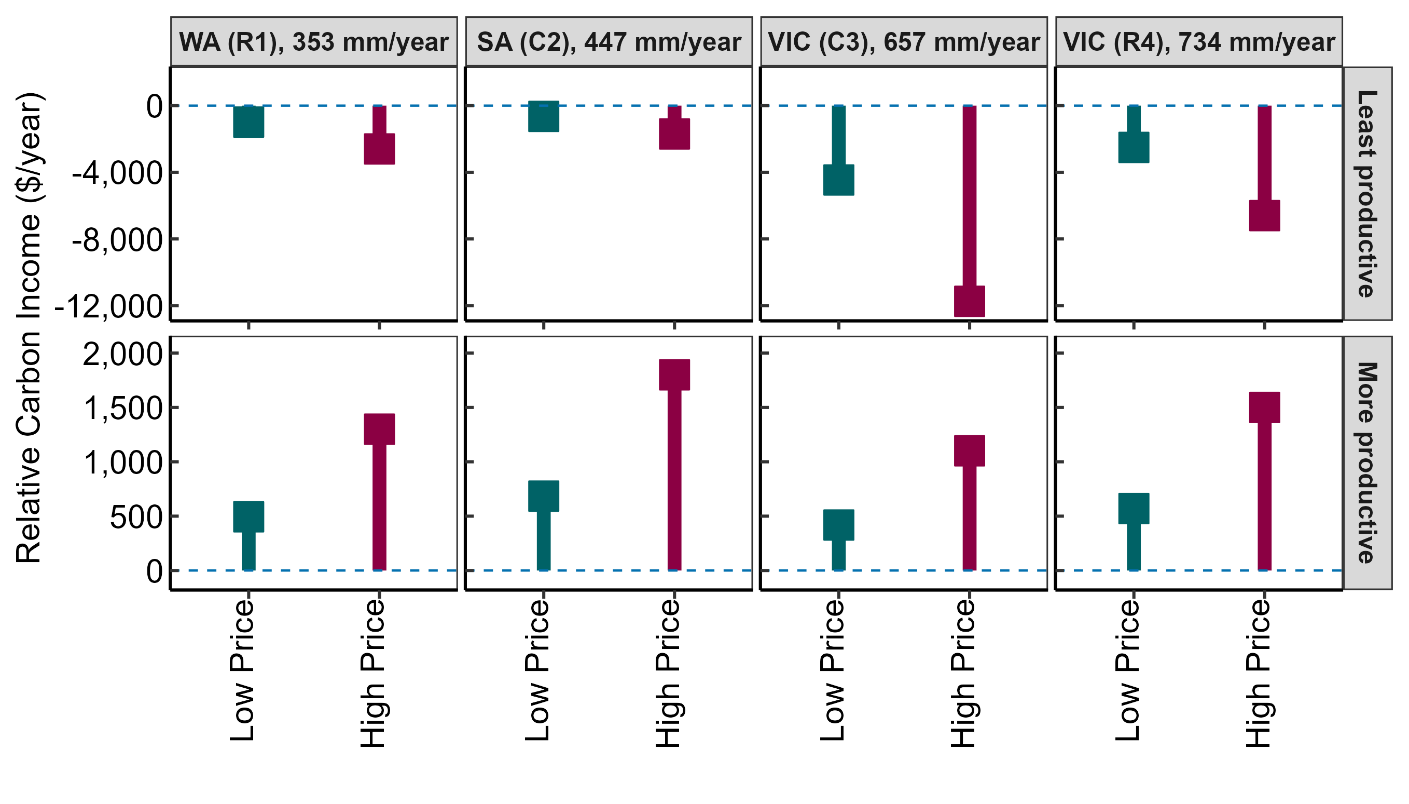


**Fig. S4.** Change in carbon income for high and low productivity botanical compositions relative to each *Baseline* at high and low carbon prices.

**
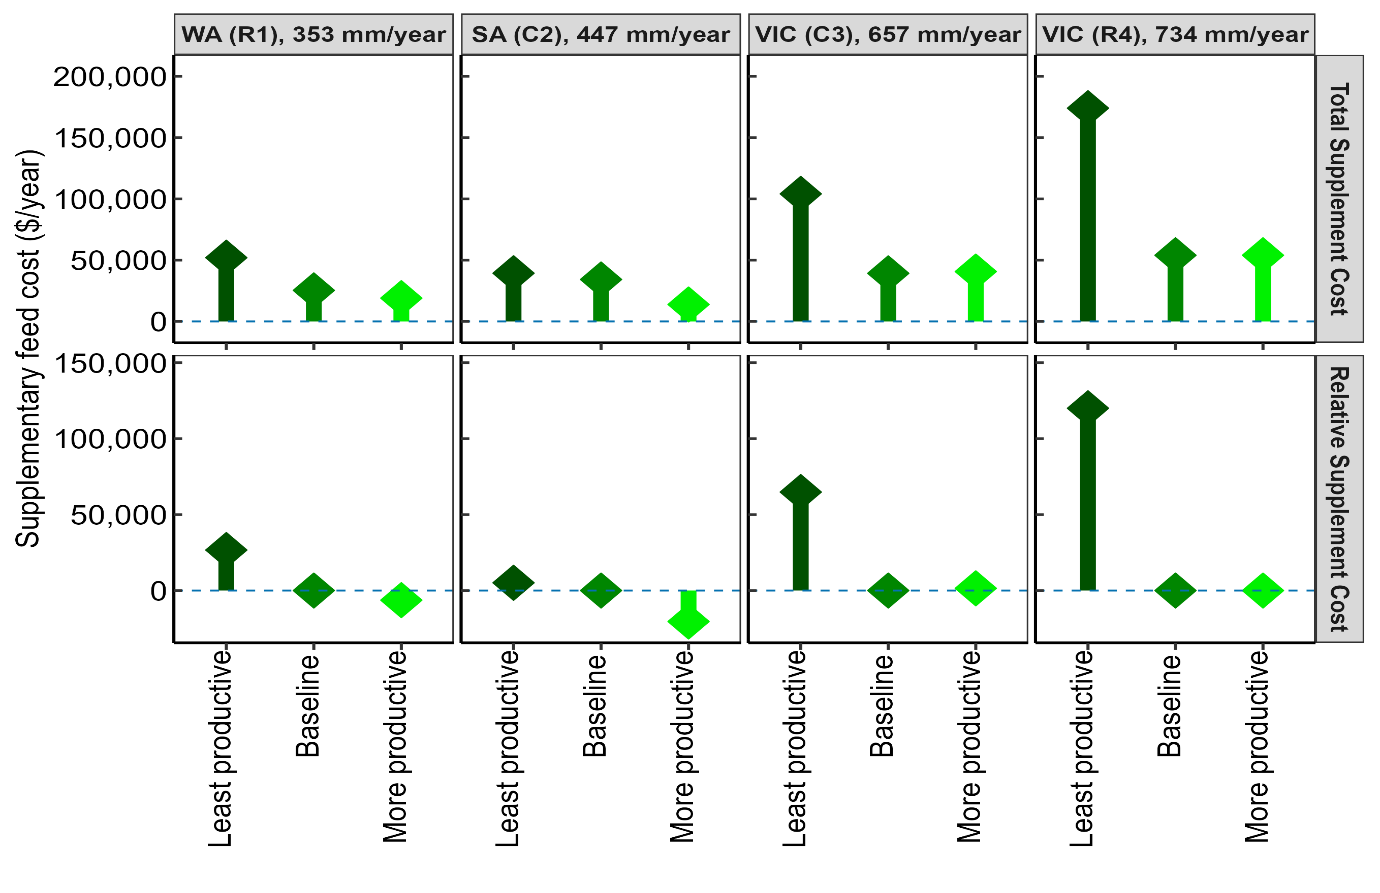
**

**Fig. S5.** Total annual and relative supplementary feed costs for botanical compositions. Relative supplementary feed cost computed as change in total supplementary feed cost for the most and least productive botanical compositions compared with the *Baseline* for each farm.

**
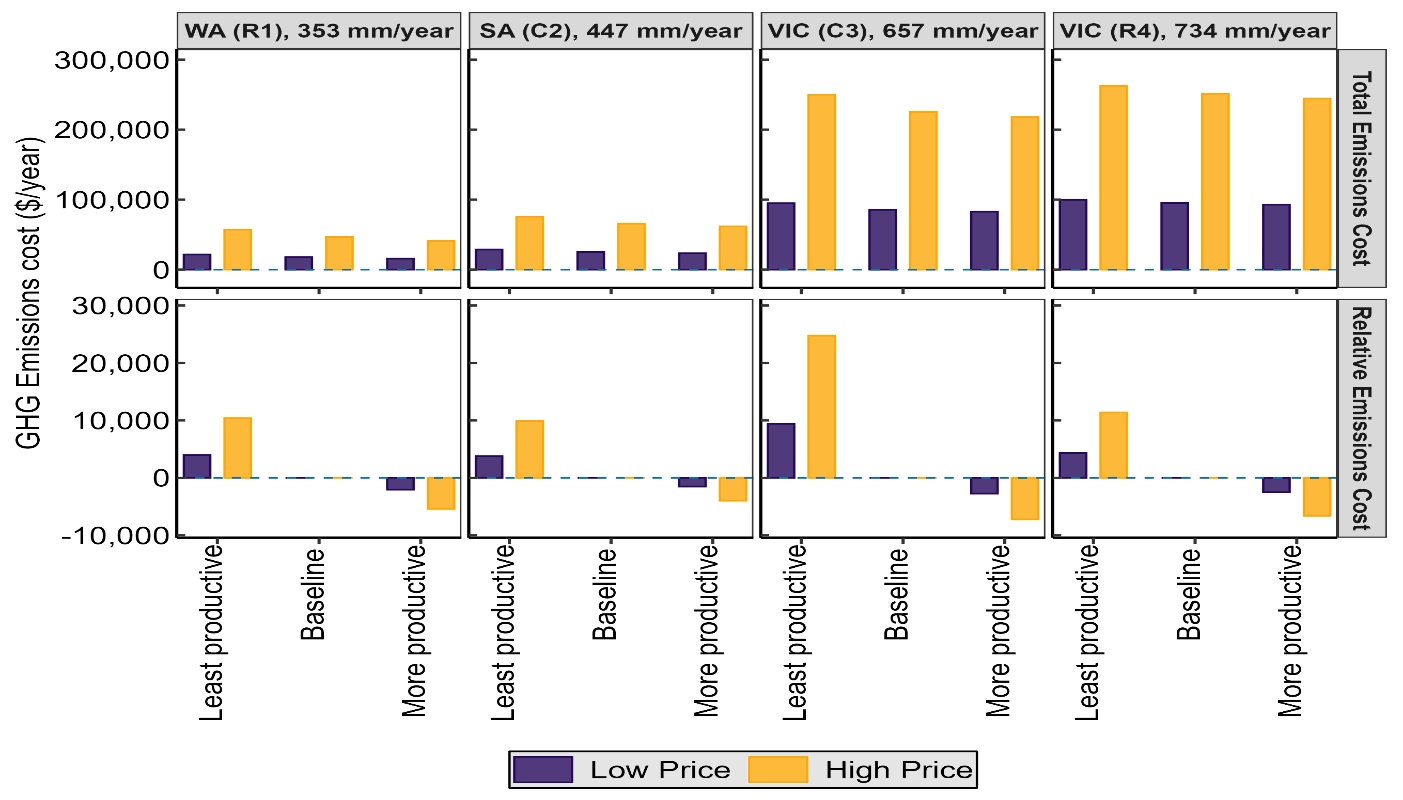
**

**Fig. S6.** Carbon emissions costs associated with botanical composition and sheep price. Relative GHG emissions cost computed relative to the *Baseline* GHG emissions for each case study farm.


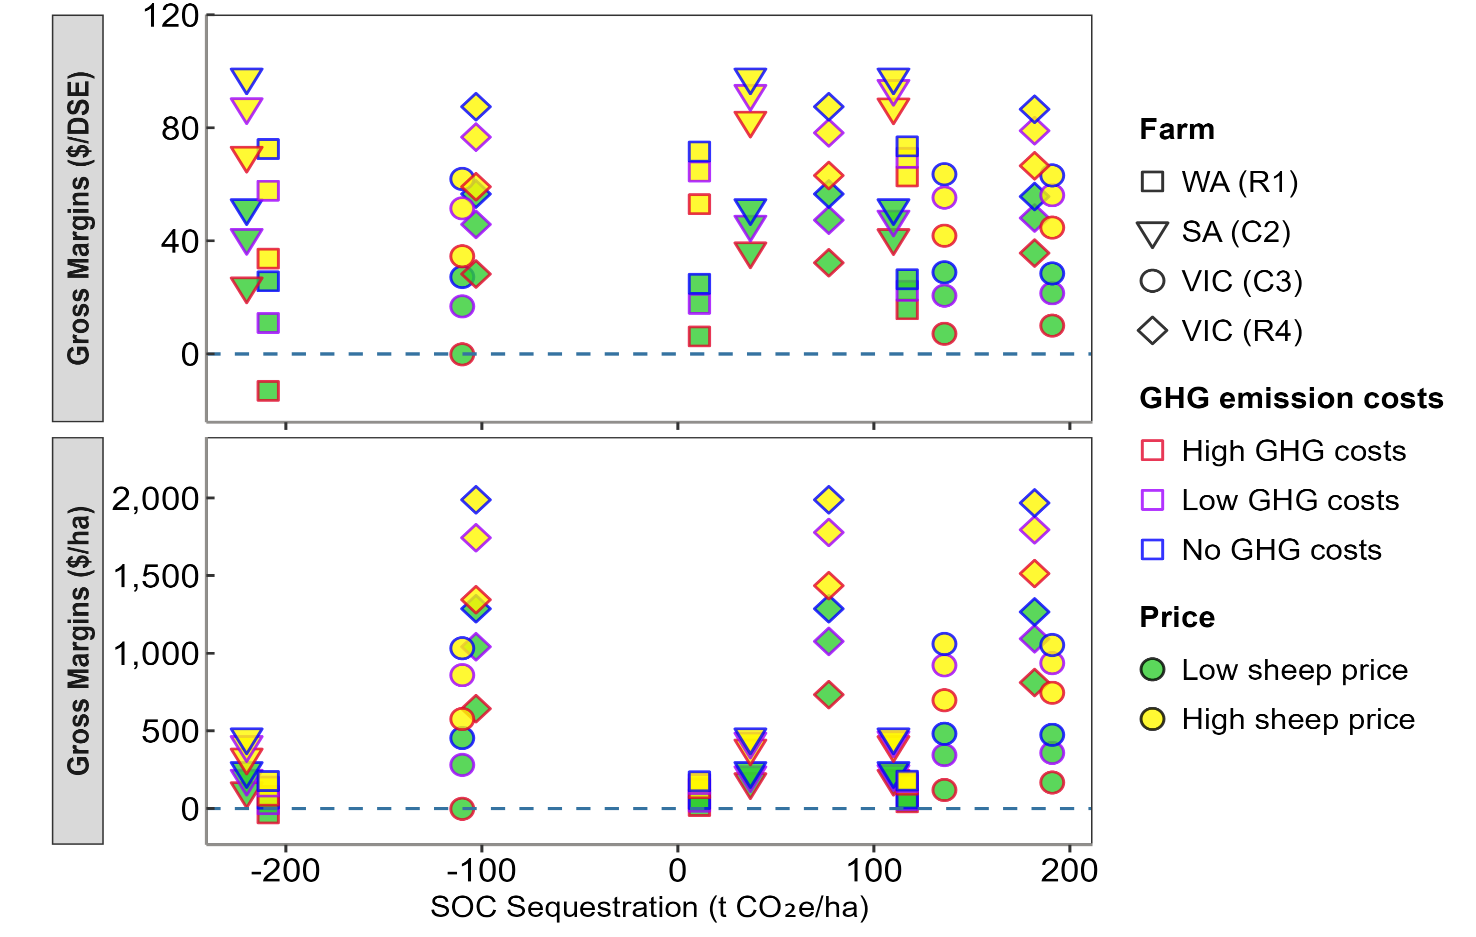


**Fig. S7.** Gross margins per dry sheep equivalent (DSE) and per grazed area relative to the SOC sequestration of the *Baseline*, low (0.3%) and high (6%) antecedent SOC levels. Gross margins were computed for high (yellow points) and low (green points) sheep prices, combined with three levels of GHG emissions costs: high (red outline), low (purple outline), and none (blue outline).


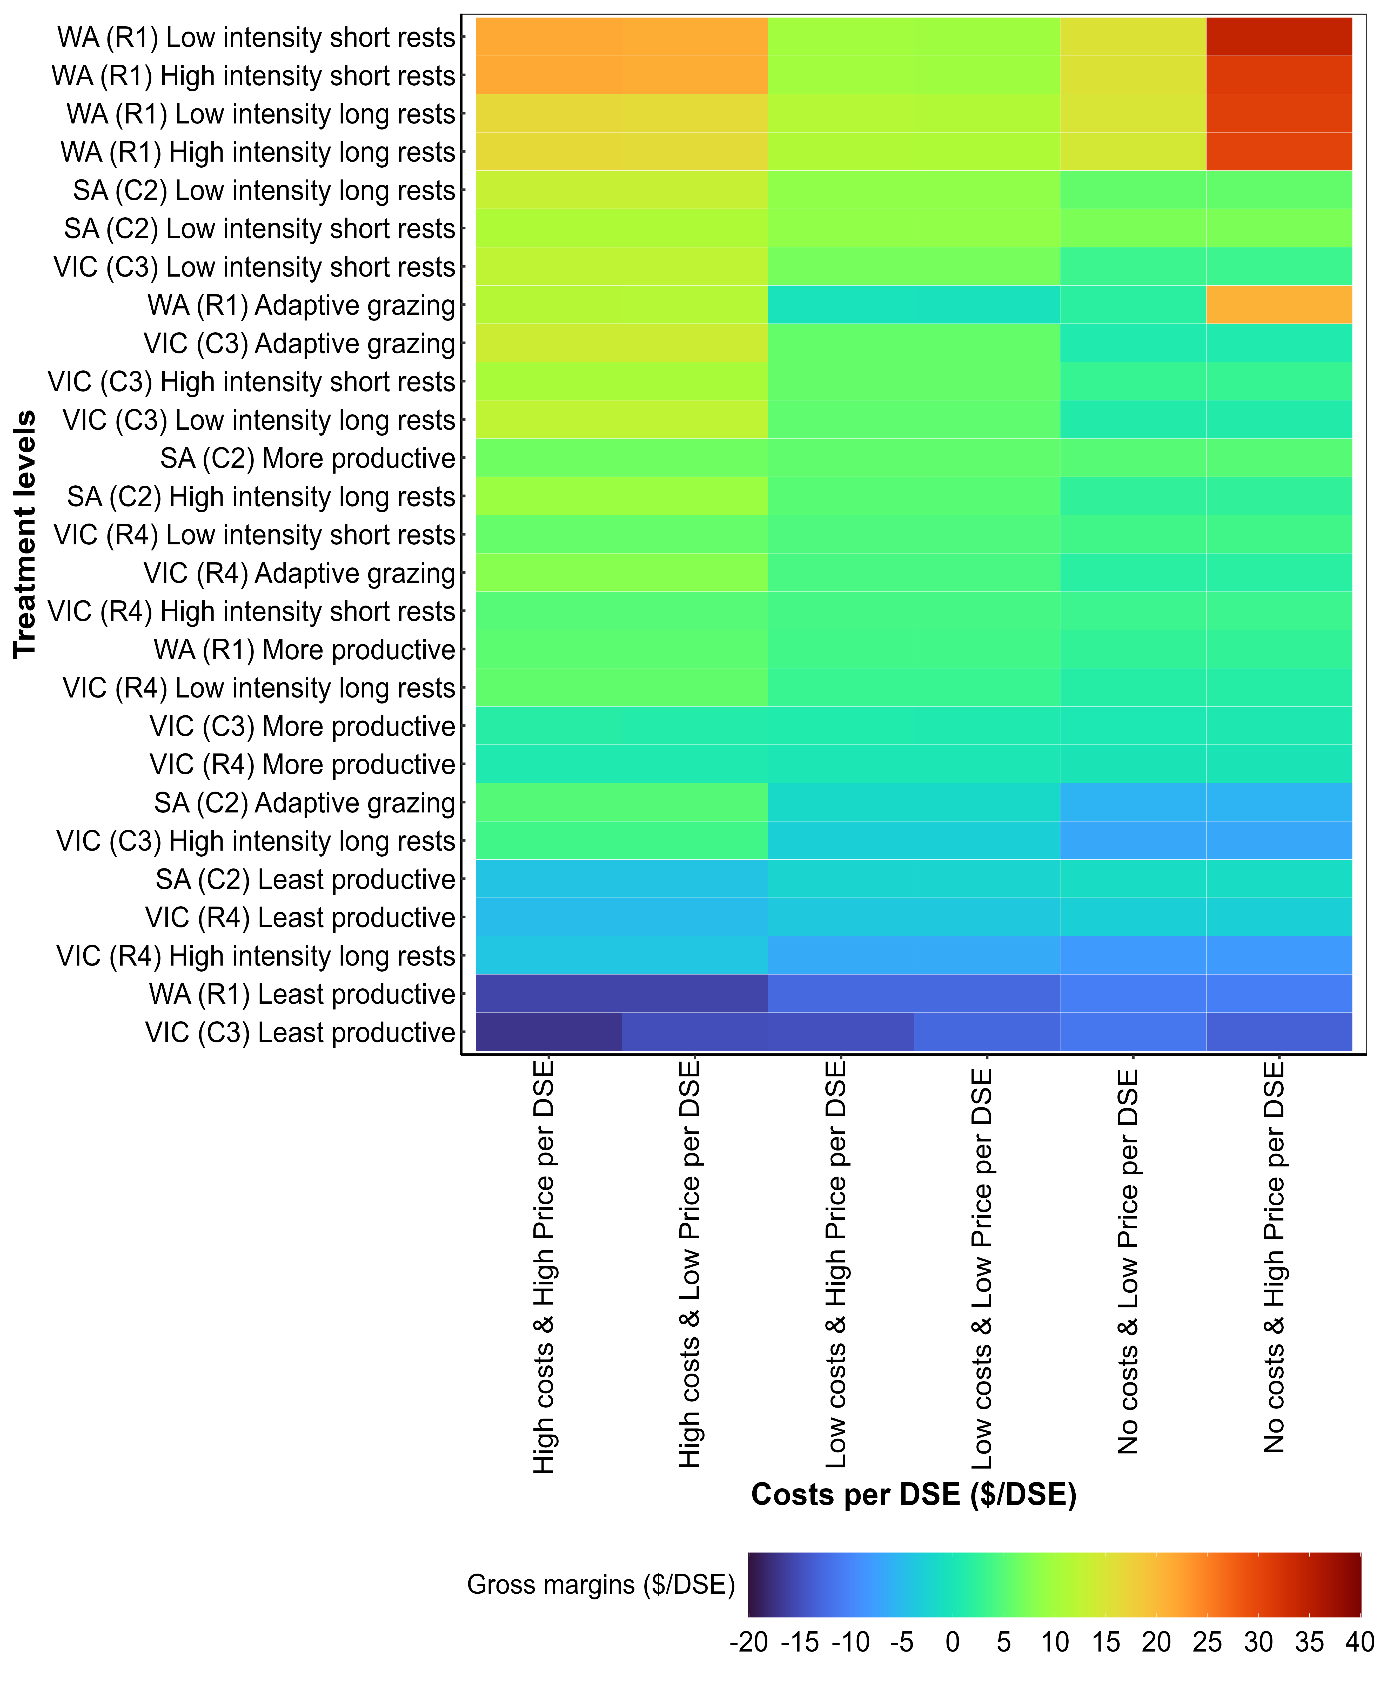


**Fig. S8.** Relative change in gross margin per dry sheep equivalent (DSE) in relation to costs associated with supplementary feeding and GHG emissions. Gross margins are contrast across all farms, pasture species and grazing regimes.


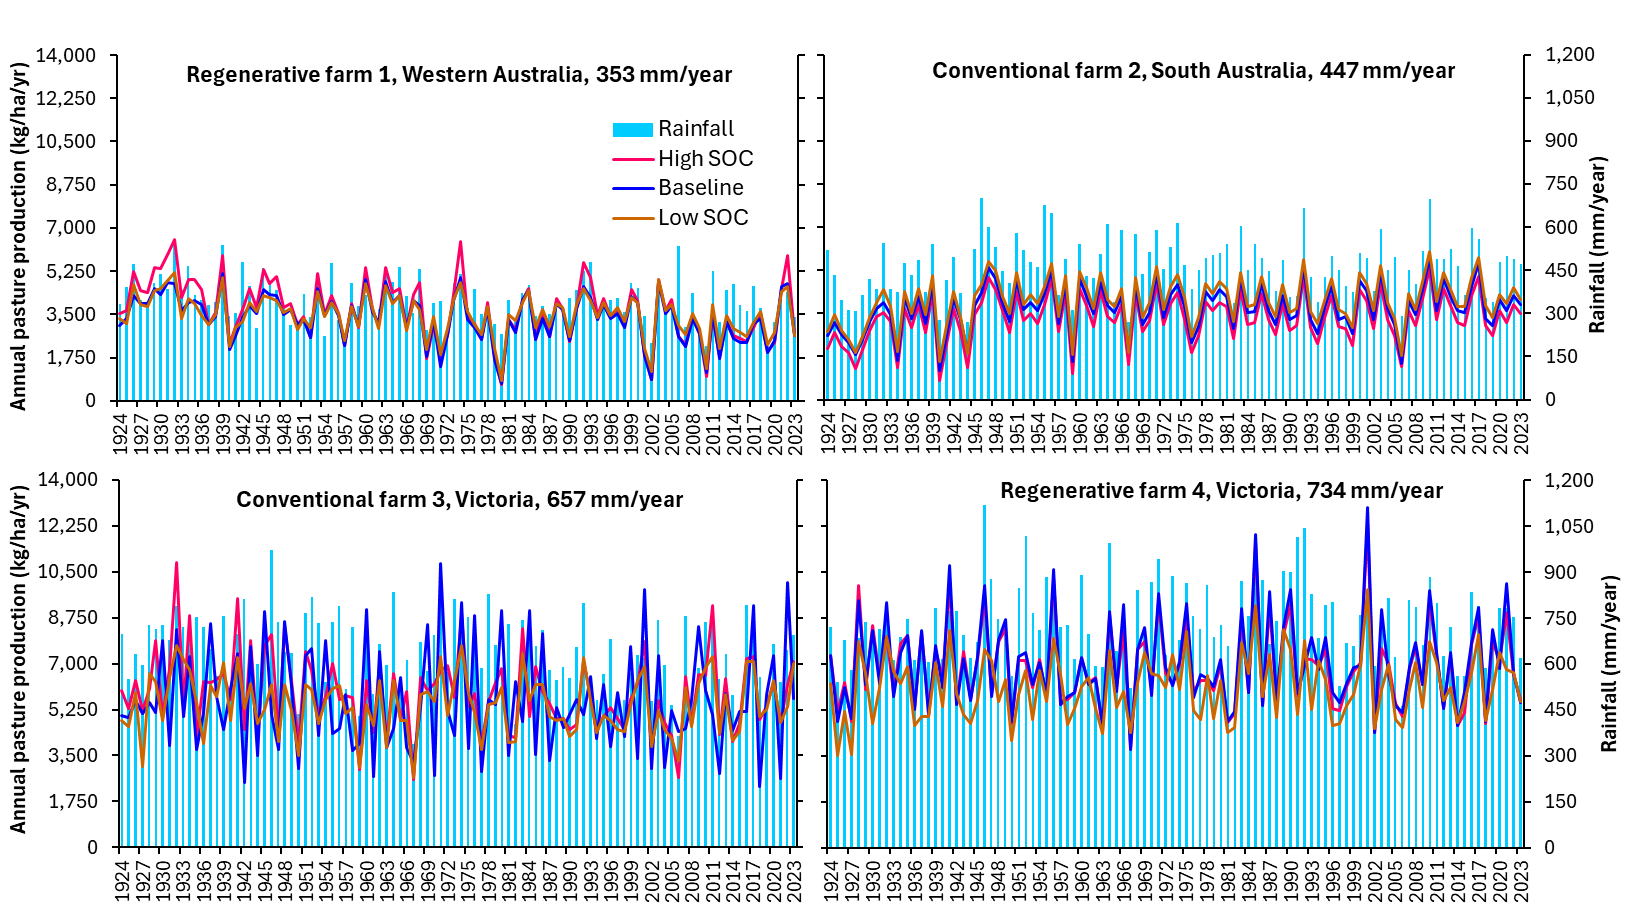


**Fig. S9.** Annual rainfall and pasture production associated with low (0.3%), high (6%) and Baseline antecedent SOC stocks.


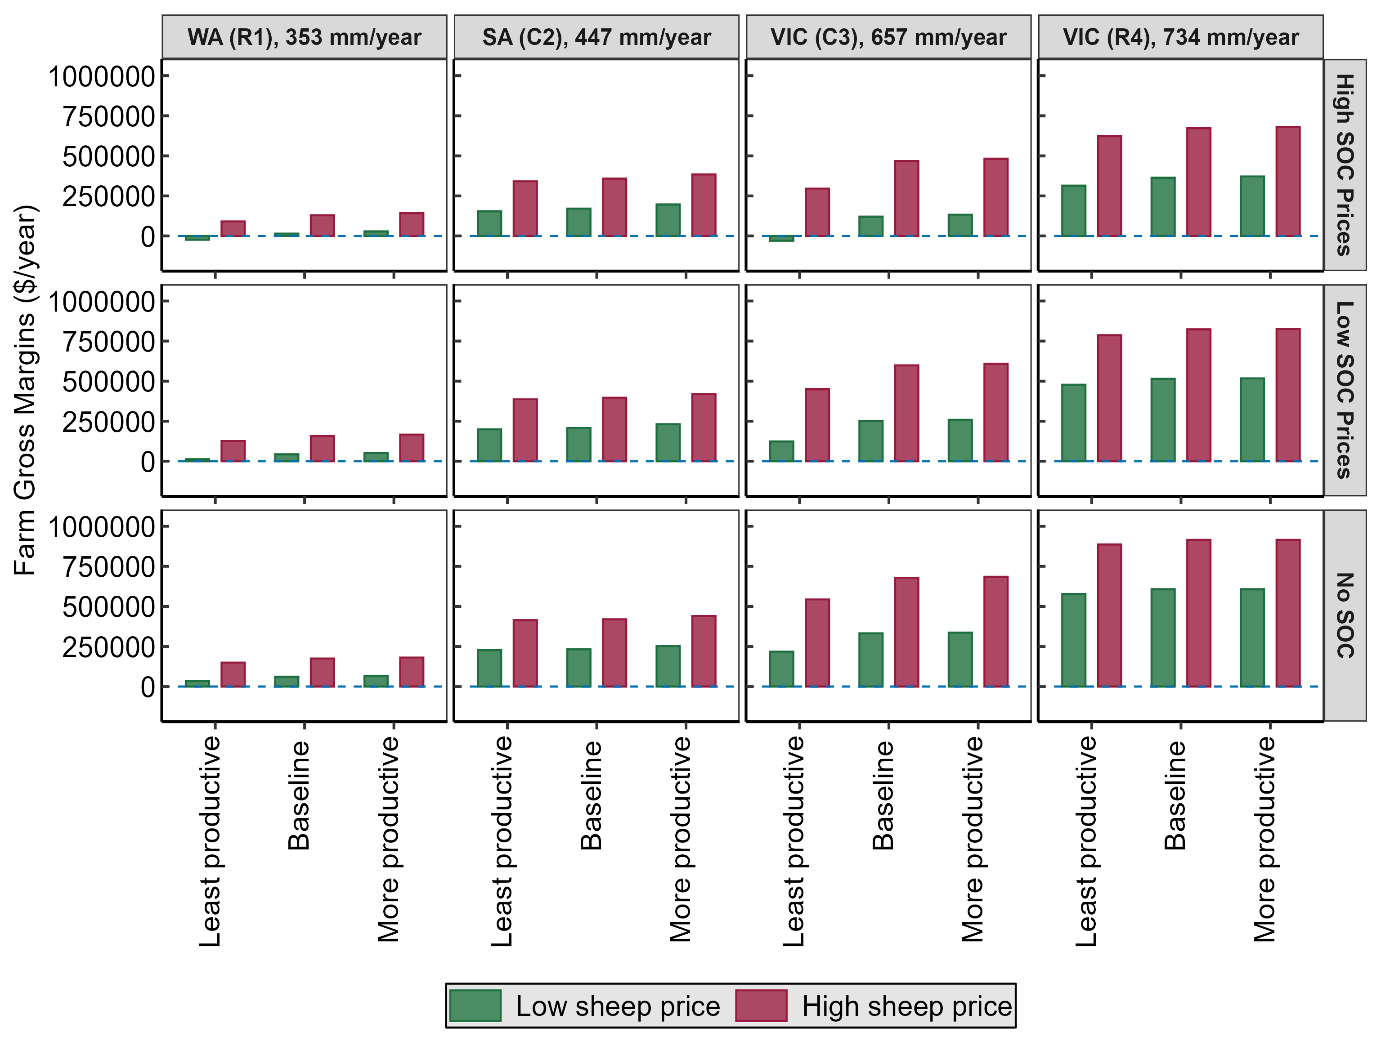


**Fig. S10.** Influence of pasture diversity on gross margins across a rainfall gradient for high and low sheep and carbon prices.

**Table S1.** Soil organic carbon (SOC) sequestration, annualised GHG emissions and carbon footprint for the highest and lowest productivity pasture botanical compositions.Absolute SOC sequestration depicted as the change inSOC stocks over 100 years (1924-2023).

| **Pasture type** | **WA (R1),**  **353 mm/year** | **SA (C2),**  **447 mm/year** | **VIC (C3),**  **657 mm/year** | **VIC (R4),**  **734 mm/year** |
| --- | --- | --- | --- | --- |
| **Change in absolute SOC (t C/ha)** | | | | | |
| More productive | | 6 | 15 | 40 | 25 |
| Least productive | | -4 | -5 | -5 | -3 |
| *Baseline* | | 3 | 10 | 37 | 21 |
| **SOC sequestration (t CO₂e/ha/yr)** | | | | | |
| More productive | | 0.02 | 0.06 | 0.25 | 0.21 |
| Least productive | | -0.02 | -0.02 | -0.03 | -0.03 |
| *Baseline* | | 0.01 | 0.04 | 0.23 | 0.10 |
| **Net farm emissions (t CO₂e/ha/yr)** | | | | | |
| More productive | | 0.4 | 0.7 | 3.6 | 5.6 |
| Least productive | | 0.6 | 0.9 | 4.2 | 6.0 |
| *Baseline* | | 0.5 | 0.8 | 3.8 | 5.7 |
| **CH₄ emissions (t CO₂e/ha/yr)** | | | | | |
| More productive | | 0.3 | 0.7 | 3.2 | 4.9 |
| Least productive | | 0.4 | 0.7 | 3.4 | 5.0 |
| *Baseline* | | 0.3 | 0.7 | 3.2 | 5.0 |
| **N₂O emissions (t CO₂e/ha/yr)** | | | | | |
| More productive | | 0.04 | 0.04 | 0.41 | 0.79 |
| Least productive | | 0.05 | 0.04 | 0.43 | 0.82 |
| *Baseline* | | 0.04 | 0.05 | 0.42 | 0.80 |
| **CO2 emissions (t CO₂e/ha/yr)** | | | | | |
| More productive | | 0.09 | 0.06 | 0.26 | 0.09 |
| Least productive | | 0.09 | 0.06 | 0.26 | 0.09 |
| *Baseline* | | 0.09 | 0.06 | 0.26 | 0.09 |
| **Emissions intensity of wool including sequestration (kg CO₂e/kg** **CFW1)** | | | | | |
| More productive | | 19.5 | 25.3 | 24.8 | 29.6 |
| Least productive | | 26.3 | 31.0 | 30.2 | 31.7 |
| *Baseline* | | 22.1 | 27.4 | 25.7 | 30.4 |
| **Emissions intensity of sheep meat including sequestration (kg CO₂e/kg LW²)** | | | | | |
| More productive | | 5.3 | 4.5 | 4.5 | 5.3 |
| Least productive | | 7.3 | 5.6 | 5.4 | 5.7 |
| *Baseline* | | 5.9 | 4.9 | 4.6 | 5.5 |

¹**CFW** = Clean fleece weight; ²**LW** = live weight

**Table S2.** Absolute soil organic carbon (SOC) accrual and relative change in SOC for low and high antecedent SOC levels in the upper soil layer (0-30 cm) over 100-years (1924-2023).Relative SOCwas computed as the change in absolute SOC compared with the *Baseline* over the same period.

| **Antecedent SOC levels** | **WA (R1), 353 mm/year** | **SA (C2), 447 mm/year** | **VIC (C3), 657 mm/year** | **VIC (R4), 734 mm/year** |
| --- | --- | --- | --- | --- |
| Soil type | Sandy loam and medium clay | Sandy soils | Clay-rich soils | Sandy loam |
| **Absolute SOC (t C/ha)** | | | | |
| *Baseline* | 3 | 10 | 37 | 21 |
| Low SOC (0.3%) | 32 | 30 | 52 | 47 |
| High SOC (6%) | -57 | -60 | -30 | -28 |
| **Relative SOC (t C/ha)** | | | | |
| Low SOC (0.3%) | 29 | 20 | 15 | 26 |
| High SOC (6%) | -60 | -70 | -67 | -49 |

**Table S3.** Absolute soil organic carbon (SOC) accrual and relative change in SOC for low and high antecedent SOC levels in the lower soil layer (30-50 cm) over 100-years (1924-2023). Relative SOC was computed as the change in absolute SOC compared with the *Baseline* over the same period.

| **Antecedent SOC levels** | **WA (R1), 353 mm/year** | **SA (C2), 447 mm/year** | **VIC (C3), 657 mm/year** | **VIC (R4), 734 mm/year** |
| --- | --- | --- | --- | --- |
| Soil type | Sandy loam and medium clay | Sandy soils | Clay-rich soils | Sandy loam |
| **Absolute SOC (t C/ha)** | | | | |
| *Baseline* | -5 | -4 | -6 | -5 |
| Low SOC (0.3%) | 1 | 1 | 2 | 2 |
| High SOC (6%) | -11 | -11 | -9 | -10 |
| **Relative SOC (t C/ha)** | | | | |
| Low SOC (0.3%) | 6 | 5 | 8 | 7 |
| High SOC (6%) | -6 | -7 | -3 | -5 |

**Table S4.** Soil organic carbon (SOC) sequestration, annualised GHG emissions and emissions intensities for the *baseline*, low (0.3%) and high (6%) antecedent SOC levels within the upper (0-30 cm), across four case study farms. Negative SOC sequestration represents SOC loss and increase in net GHG emissions, while positive SOC sequestration represents SOC accrual and decrease in net GHG emissions.

| **Antecedent SOC levels** | **WA (R1),**  **353 mm/year** | **SA (C2),**  **447 mm/year** | **VIC (C3),**  **657 mm/year** | **VIC (R4),**  **734 mm/year** |
| --- | --- | --- | --- | --- |
| **SOC sequestration (t CO₂e/ha/year)** | | | | |
| *Baseline* | 0.01 | 0.04 | 0.23 | 0.18 |
| Low SOC (0.3%) | 0.12 | 0.13 | 0.32 | 0.41 |
| High SOC (6%) | -0.21 | -0.25 | -0.18 | -0.23 |
| **Net farm emissions (t CO₂e/ha/year)** | | | | |
| *Baseline* | 0.5 | 0.8 | 3.9 | 5.7 |
| Low SOC (0.3%) | 0.4 | 0.6 | 3.4 | 5.0 |
| High SOC (6%) | 0.7 | 1.0 | 4.4 | 6.3 |
| **CH₄ emissions (t CO₂e/ha/year)** | | | | |
| *Baseline* | 0.3 | 0.7 | 3.4 | 5.0 |
| Low SOC (0.3%) | 0.3 | 0.6 | 3.0 | 5.0 |
| High SOC (6%) | 0.4 | 0.7 | 3.5 | 5.1 |
| **N₂O emissions (t CO₂e/ha/year)** | | | | |
| *Baseline* | 0.04 | 0.05 | 0.43 | 0.80 |
| Low SOC (0.3%) | 0.04 | 0.04 | 0.43 | 0.66 |
| High SOC (6%) | 0.04 | 0.05 | 0.44 | 0.72 |
| **CO2 emissions (t CO₂e/ha/year)** | | | | |
| *Baseline* | 0.13 | 0.06 | 0.26 | 0.09 |
| Low SOC (0.3%) | 0.13 | 0.06 | 0.26 | 0.09 |
| High SOC (6%) | 0.13 | 0.06 | 0.26 | 0.09 |
| **Emissions intensity of wool including sequestration (kg CO₂e/kg CFW)** | | | | |
| *Baseline* | 24.0 | 36.3 | 26.5 | 30.4 |
| Low SOC (0.3%) | 17.9 | 29.9 | 25.5 | 28.9 |
| High SOC (6%) | 34.9 | 50.0 | 30.4 | 33.1 |
| **Emissions intensity of sheep meat including sequestration (kg CO₂e/kg LW)** | | | | |
| *Baseline* | 6.4 | 6.5 | 4.8 | 5.5 |
| Low SOC (0.3%) | 4.8 | 5.4 | 4.6 | 5.2 |
| High SOC (6%) | 9.4 | 9.0 | 5.5 | 6.0 |

**Table S5.** Average pasture productivity, supplementary feed intake, and liveweight for *Baseline,* low (0.3%) and high (6%) antecedent SOC levels across four regions.

| **Antecedent SOC levels** | **WA (R1),** **353 mm/year** | **SA (C2), 447 mm/year** | **VIC (C3), 657 mm/year** | **VIC (R4), 734 mm/year** |
| --- | --- | --- | --- | --- |
| **Average monthly pasture growth rate (kg/ha/day)** | | | | |
| *Baseline* | 9 | 10 | 16 | 19 |
| Low SOC (0.3%) | 10 | 10 | 15 | 17 |
| High SOC (6%) | 10 | 10 | 16 | 19 |
| **Mean annual pasture production (kg/ha/yr)** | | | | |
| *Baseline* | 3,386 | 3,608 | 5,808 | 7,045 |
| Low SOC (0.3%) | 3,484 | 3,592 | 5,440 | 6,122 |
| High SOC (6%) | 3,460 | 3,604 | 5,873 | 6,908 |
| **Average annual supplementary feed intake (kg/animal/yr)** | | | | |
| *Baseline* | 24 | 47 | 19 | 18 |
| Low SOC (0.3%) | 21 | 47 | 21 | 21 |
| High SOC (6%) | 22 | 47 | 19 | 18 |

**Table S6.** Effects of grazing regime on absolute SOC storage and relative change in the topsoil SOC (0-30 cm) across four regions. Absolute SOC accrual was calculated as the change in SOC stocks over 100-years (1924-2023) relative to the initial year (1924). Relative change in SOC was calculated as the change in absolute SOC compared with the *Baseline*.

| **Grazing regime** | **WA (R1), 353 mm/year** | **SA (C2), 447 mm/year** | **VIC (C3), 657 mm/year** | **VIC (R4), 734 mm/year** |
| --- | --- | --- | --- | --- |
| **Change in absolute SOC (t C/ha) 0-30 cm** | | | | |
| Adaptive grazing | 27 | 23 | 79 | 45 |
| High intensity long rests | 23 | 22 | 72 | 42 |
| Low intensity long rests | 19 | 17 | 70 | 36 |
| High intensity short rests | 15 | 12 | 69 | 29 |
| Low intensity short rests | 7 | 5 | 66 | 24 |
| Set stocked (*Baseline*) | 3 | 10 | 37 | 21 |
| **Relative change in SOC (t C/ha) 0-30 cm** | | | | |
| Adaptive grazing | 24 | 13 | 42 | 24 |
| High intensity long rests | 20 | 12 | 35 | 21 |
| Low intensity long rests | 16 | 7 | 33 | 15 |
| High intensity short rests | 12 | 2 | 32 | 8 |
| Low intensity short rests | 4 | -5 | 29 | 3 |

**Table S7.** Effects of grazing regime on topsoil (0-30 cm) soil organic carbon (SOC) sequestration, net GHG emissions (carbon, enteric methane and nitrous oxide) and emissions intensity of wool and sheep meat across four regions in southern Australia depicted along a rainfall gradient.

| **Grazing regime** | **WA (R1), 353 mm/year** | **SA (C2), 447 mm/year** | **VIC (C3), 657 mm/year** | **VIC (R4), 734 mm/year** |
| --- | --- | --- | --- | --- |
| **Carbon sequestration (****t CO₂e/year)** | | | | |
| Adaptive grazing | -0.10 | -0.10 | -0.48 | -0.38 |
| High intensity long rests | -0.08 | -0.09 | -0.44 | -0.35 |
| Low intensity long rests | -0.07 | -0.07 | -0.43 | -0.30 |
| High intensity short rests | -0.06 | -0.05 | -0.42 | -0.24 |
| Low intensity short rests | -0.03 | -0.02 | -0.40 | -0.20 |
| Set stocked (*Baseline*) | -0.01 | -0.04 | -0.23 | -0.18 |
| **Net farm emissions (t CO₂e/year)** | | | | |
| Adaptive grazing | 0.08 | 0.32 | 1.96 | 4.52 |
| High intensity long rests | 0.13 | 0.48 | 2.31 | 4.95 |
| Low intensity long rests | 0.13 | 0.44 | 2.18 | 4.89 |
| High intensity short rests | 0.25 | 0.59 | 2.80 | 5.39 |
| Low intensity short rests | 0.22 | 0.57 | 2.48 | 5.21 |
| Set stocked (*Baseline*) | 0.47 | 0.76 | 3.85 | 5.71 |
| **CH₄ emissions (t CO₂e/year)** | | | | |
| Adaptive grazing | 0.07 | 0.31 | 1.97 | 4.21 |
| High intensity long rests | 0.10 | 0.46 | 2.25 | 4.57 |
| Low intensity long rests | 0.09 | 0.43 | 2.13 | 4.43 |
| High intensity short rests | 0.18 | 0.54 | 2.59 | 4.79 |
| Low intensity short rests | 0.13 | 0.49 | 2.36 | 4.68 |
| Set stocked (*Baseline*) | 0.35 | 0.68 | 3.36 | 4.96 |
| **N₂O emissions (t CO₂e/year)** | | | | |
| Adaptive grazing | 0.07 | 0.31 | 1.97 | 4.21 |
| High intensity long rests | 0.10 | 0.46 | 2.25 | 4.57 |
| Low intensity long rests | 0.09 | 0.43 | 2.13 | 4.43 |
| High intensity short rests | 0.18 | 0.54 | 2.59 | 4.79 |
| Low intensity short rests | 0.13 | 0.49 | 2.36 | 4.68 |
| Set stocked (*Baseline*) | 0.35 | 0.68 | 3.36 | 4.96 |
| **CO2 emissions (t CO₂e/year)** | | | | |
| Adaptive grazing | 0.09 | 0.06 | 0.26 | 0.09 |
| High intensity long rests | 0.09 | 0.06 | 0.26 | 0.09 |
| Low intensity long rests | 0.09 | 0.06 | 0.26 | 0.09 |
| High intensity short rests | 0.09 | 0.06 | 0.26 | 0.09 |
| Low intensity short rests | 0.09 | 0.06 | 0.26 | 0.09 |
| Set stocked (*Baseline*) | 0.09 | 0.06 | 0.26 | 0.09 |
| **Emissions intensity of wool including sequestration (kg CO₂e/kg CFW)** | | | | |
| Adaptive grazing | 3.7 | 15.2 | 12.2 | 24.1 |
| High intensity long rests | 6.2 | 23.0 | 14.8 | 26.4 |
| Low intensity long rests | 6.0 | 21.2 | 13.9 | 26.6 |
| High intensity short rests | 11.7 | 28.3 | 18.5 | 28.8 |
| Low intensity short rests | 10.3 | 27.2 | 16.1 | 27.8 |
| Set stocked (*Baseline*) | 22.1 | 36.3 | 26.5 | 30.4 |
| **Emissions intensity of sheep meat including sequestration (kg CO₂e/kg LW)** | | | | |
| Adaptive grazing | 1.0 | 2.7 | 2.2 | 4.3 |
| High intensity long rests | 1.7 | 4.1 | 2.7 | 4.8 |
| Low intensity long rests | 1.6 | 3.8 | 2.5 | 4.8 |
| High intensity short rests | 3.1 | 5.1 | 3.3 | 5.2 |
| Low intensity short rests | 2.8 | 4.9 | 2.9 | 5.0 |
| Set stocked (*Baseline*) | 5.9 | 6.5 | 4.8 | 5.5 |

**Table S8.** Long-term average pasture productivity, supplementary feed intake and liveweight.

| **Grazing regime** | **WA (R1), 353 mm/year** | **SA (C2), 447 mm/year** | **VIC (C3), 657 mm/year** | **VIC (R4), 734 mm/year** |
| --- | --- | --- | --- | --- |
| **Average monthly pasture growth rate (****kg/ha/day)** | | | | |
| Adaptive grazing | 13 | 15 | 22 | 25 |
| Low intensity long rests | 12 | 14 | 20 | 23 |
| High intensity short rests | 12 | 13 | 20 | 23 |
| Low intensity short rests | 12 | 13 | 20 | 23 |
| High intensity long rests | 11 | 12 | 19 | 22 |
| Set stocked (*Baseline*) | 9 | 10 | 16 | 19 |
| **Mean annual pasture production (kg/ha/yr)** | | | | |
| Adaptive grazing | 4,704 | 5,223 | 8,243 | 8,986 |
| Low intensity long rests | 4,552 | 4,998 | 7,306 | 8,571 |
| High intensity short rests | 4,468 | 4,887 | 7,245 | 8,354 |
| Low intensity short rests | 4,401 | 4,877 | 7,205 | 8,256 |
| High intensity long rests | 4,231 | 4,647 | 7,063 | 8,171 |
| Set stocked (*Baseline*) | 3,386 | 3,608 | 5,808 | 7,045 |
| **Average annual supplementary feed intake (kg/animal/yr)** | | | | |
| Adaptive grazing | 43 | 66 | 16 | 12 |
| High intensity long rests | 14 | 39 | 42 | 45 |
| Low intensity long rests | 13 | 28 | 15 | 13 |
| Low intensity short rests | 12 | 23 | 9 | 7 |
| High intensity short rests | 12 | 22 | 8 | 6 |
| Set stocked (*Baseline*) | 24 | 47 | 19 | 18 |

**Table S9.** Impacts of pasture botanical composition on gross margins per year, per dry sheep equivalent (DSE), and per grazed area across four case study sheep farms, depicted along a rainfall gradient. Gross margins were computed under high and low sheep prices, as well as with high, low, and no GHG emissions costs.

| **Pasture type** | **Emission costs** | **WA (R1), 353 mm/year** | | **SA (C2), 447 mm/year** | | **VIC (C3), 657 mm/year** | | **VIC (R4), 734 mm/year** | |
| --- | --- | --- | --- | --- | --- | --- | --- | --- | --- |
| **Low Price** | **High Price** | **Low Price** | **High Price** | **Low Price** | **High Price** | **Low Price** | **High Price** |
| **Gross margin ($/year)** | | | | | | | | | |
| Least productive | High costs | -23,766 | 90,962 | 153,641 | 341,186 | -30,355 | 295,736 | 314,091 | 622,904 |
| Low costs | 12,504 | 127,232 | 199,279 | 386,824 | 123,466 | 449,558 | 477,511 | 786,325 |
| No costs | 34,734 | 149,462 | 227,251 | 414,796 | 217,744 | 543,836 | 577,672 | 886,485 |
| *Baseline* | High costs | 15,066 | 129,241 | 170,350 | 357,895 | 120,394 | 467,298 | 363,411 | 672,224 |
| Low costs | 43,276 | 157,451 | 208,790 | 396,335 | 251,593 | 598,497 | 514,319 | 823,132 |
| No costs | 60,566 | 174,741 | 232,350 | 419,895 | 332,006 | 678,910 | 606,811 | 915,624 |
| More productive | High costs | 28,104 | 142,279 | 196,534 | 384,079 | 132,761 | 481,978 | 371,528 | 680,342 |
| Low costs | 52,160 | 166,335 | 231,386 | 418,932 | 258,796 | 608,012 | 517,403 | 826,217 |
| No costs | 66,904 | 181,079 | 252,747 | 440,293 | 336,043 | 685,259 | 606,811 | 915,624 |
| **Gross margin per dry sheep equivalent ($/DSE)** | | | | | | | | | |
| Least productive | High costs | -10 | 37 | 38 | 84 | -3 | 30 | 31 | 62 |
| Low costs | 5 | 52 | 49 | 95 | 12 | 45 | 48 | 79 |
| No costs | 14 | 61 | 56 | 102 | 22 | 54 | 58 | 89 |
| *Baseline* | High costs | 6 | 53 | 42 | 88 | 12 | 47 | 36 | 67 |
| Low costs | 18 | 65 | 51 | 98 | 25 | 60 | 51 | 82 |
| No costs | 25 | 72 | 57 | 104 | 33 | 68 | 61 | 92 |
| More productive | High costs | 12 | 59 | 48 | 95 | 13 | 48 | 37 | 68 |
| Low costs | 21 | 69 | 57 | 103 | 26 | 61 | 52 | 83 |
| No costs | 28 | 75 | 62 | 109 | 34 | 69 | 61 | 92 |
| **Gross margin per grazed area ($/ha)** | | | | | | | | | |
| Least productive | High costs | -24 | 91 | 178 | 394 | -51 | 493 | 714 | 1,416 |
| Low costs | 13 | 127 | 230 | 447 | 206 | 749 | 1,085 | 1,787 |
| No costs | 35 | 149 | 263 | 480 | 363 | 906 | 1,313 | 2,015 |
| *Baseline* | High costs | 15 | 129 | 197 | 414 | 201 | 779 | 826 | 1,528 |
| Low costs | 43 | 157 | 241 | 458 | 419 | 997 | 1,169 | 1,871 |
| No costs | 61 | 175 | 269 | 485 | 553 | 1,132 | 1,379 | 2,081 |
| More productive | High costs | 52 | 166 | 227 | 444 | 221 | 803 | 844 | 1,546 |
| Low costs | 28 | 142 | 267 | 484 | 431 | 1,013 | 1,176 | 1,878 |
| No costs | 67 | 181 | 292 | 509 | 560 | 1,142 | 1,379 | 2,081 |

**Table S10.** Effects of grazing regime on annual gross margins per dry sheep equivalent (DSE) and per grazed area. Gross margins were quantified under high and low sheep prices, as well as with high, low, and zero GHG emissions costs.

| **Grazing regime** | **Emission costs** | **WA (R1), 353 mm/year** | | **SA (C2), 447 mm/year** | | **VIC (C3), 657 mm/year** | | **VIC (R4), 734 mm/year** | |
| --- | --- | --- | --- | --- | --- | --- | --- | --- | --- |
| **Low Price** | **High Price** | **Low Price** | **High Price** | **Low Price** | **High Price** | **Low Price** | **High Price** |
| **Gross margins ($/year)** | | | | | | | | | |
| *Baseline* | Low costs | 43,276 | 157,451 | 185,853 | 373,398 | 206,189 | 553,093 | 473,431 | 782,245 |
| High costs | 15,066 | 129,241 | 147,413 | 334,958 | 71,326 | 418,230 | 322,523 | 631,337 |
| No costs | 60,566 | 174,741 | 209,413 | 396,958 | 288,847 | 635,751 | 565,923 | 874,737 |
| Low intensity long rests | Low costs | 70,816 | 185,544 | 220,328 | 407,874 | 260,871 | 607,775 | 504,163 | 812,977 |
| High costs | 67,344 | 182,072 | 200,426 | 387,972 | 195,647 | 542,551 | 378,923 | 687,737 |
| No costs | 72,944 | 187,672 | 232,526 | 420,072 | 300,847 | 647,751 | 580,923 | 889,737 |
| High intensity long rests | Low costs | 70,135 | 184,863 | 206,415 | 393,960 | 177,249 | 524,153 | 407,973 | 716,787 |
| High costs | 67,283 | 182,011 | 185,645 | 373,190 | 107,747 | 454,651 | 282,423 | 591,237 |
| No costs | 71,883 | 186,611 | 219,145 | 406,690 | 219,847 | 566,751 | 484,923 | 793,737 |
| Low intensity short rests | Low costs | 66,709 | 181,438 | 221,851 | 409,397 | 274,461 | 621,365 | 518,133 | 826,947 |
| High costs | 54,805 | 169,534 | 192,525 | 380,071 | 197,147 | 544,051 | 381,423 | 690,237 |
| No costs | 74,005 | 188,734 | 239,825 | 427,371 | 321,847 | 668,751 | 601,923 | 910,737 |
| High intensity short rests | Low costs | 66,747 | 181,476 | 220,825 | 408,370 | 264,659 | 611,563 | 512,815 | 821,629 |
| High costs | 54,905 | 169,634 | 191,809 | 379,354 | 176,247 | 523,151 | 372,323 | 681,137 |
| No costs | 74,005 | 188,734 | 238,609 | 426,154 | 318,847 | 665,751 | 598,923 | 907,737 |
| Adaptive grazing | Low costs | 41,862 | 156,590 | 179,003 | 366,549 | 264,103 | 611,007 | 514,649 | 823,463 |
| High costs | 43,102 | 157,830 | 167,099 | 354,645 | 209,047 | 555,951 | 401,623 | 710,437 |
| No costs | 41,102 | 155,830 | 186,299 | 373,845 | 297,847 | 644,751 | 583,923 | 892,737 |
| **Gross margins per dry sheep equivalent ($/DSE)** | | | | | | | | | |
| *Baseline* | Low costs | 18 | 65 | 46 | 92 | 21 | 55 | 47 | 78 |
| High costs | 6 | 53 | 36 | 83 | 7 | 42 | 32 | 63 |
| No costs | 25 | 72 | 52 | 98 | 29 | 64 | 57 | 87 |
| Low intensity long rests | Low costs | 29 | 76 | 54 | 101 | 26 | 61 | 50 | 81 |
| High costs | 28 | 75 | 49 | 96 | 20 | 54 | 38 | 69 |
| No costs | 30 | 77 | 57 | 104 | 30 | 65 | 58 | 89 |
| High intensity long rests | Low costs | 29 | 76 | 51 | 97 | 18 | 52 | 41 | 72 |
| High costs | 28 | 75 | 46 | 92 | 11 | 45 | 28 | 59 |
| No costs | 29 | 76 | 54 | 100 | 22 | 57 | 48 | 79 |
| Low intensity short rests | Low costs | 27 | 74 | 55 | 101 | 27 | 62 | 52 | 83 |
| High costs | 22 | 69 | 47 | 94 | 20 | 54 | 38 | 69 |
| No costs | 30 | 77 | 59 | 105 | 32 | 67 | 60 | 91 |
| High intensity short rests | Low costs | 27 | 74 | 54 | 101 | 26 | 61 | 51 | 82 |
| High costs | 23 | 70 | 47 | 94 | 18 | 52 | 37 | 68 |
| No costs | 30 | 77 | 59 | 105 | 32 | 67 | 60 | 91 |
| Adaptive grazing | Low costs | 17 | 64 | 44 | 90 | 26 | 61 | 51 | 82 |
| High costs | 18 | 65 | 41 | 87 | 21 | 56 | 40 | 71 |
| No costs | 17 | 64 | 46 | 92 | 30 | 64 | 58 | 89 |
| **Gross margin per** **grazed area ($/ha)** | | | | | | | | | |
| *Baseline* | Low costs | 43 | 157 | 215 | 432 | 344 | 922 | 1,076 | 1,778 |
| High costs | 15 | 129 | 170 | 387 | 119 | 697 | 733 | 1,435 |
| No costs | 61 | 175 | 242 | 459 | 481 | 1,060 | 1,286 | 1,988 |
| Low intensity long rests | Low costs | 71 | 186 | 255 | 472 | 435 | 1,013 | 1,146 | 1,848 |
| High costs | 67 | 182 | 232 | 449 | 326 | 904 | 861 | 1,563 |
| No costs | 73 | 188 | 269 | 486 | 501 | 1,080 | 1,320 | 2,022 |
| High intensity long rests | Low costs | 70 | 185 | 239 | 455 | 295 | 874 | 927 | 1,629 |
| High costs | 67 | 182 | 215 | 431 | 180 | 758 | 642 | 1,344 |
| No costs | 72 | 187 | 253 | 470 | 366 | 945 | 1,102 | 1,804 |
| Low intensity short rests | Low costs | 67 | 181 | 256 | 473 | 457 | 1,036 | 1,178 | 1,879 |
| High costs | 55 | 170 | 223 | 439 | 329 | 907 | 867 | 1,569 |
| No costs | 74 | 189 | 277 | 494 | 536 | 1,115 | 1,368 | 2,070 |
| High intensity short rests | Low costs | 67 | 181 | 255 | 472 | 441 | 1,019 | 1,165 | 1,867 |
| High costs | 55 | 170 | 222 | 439 | 294 | 872 | 846 | 1,548 |
| No costs | 74 | 189 | 276 | 493 | 531 | 1,110 | 1,361 | 2,063 |
| Adaptive grazing | Low costs | 42 | 157 | 207 | 424 | 440 | 1,018 | 1,170 | 1,872 |
| High costs | 43 | 158 | 193 | 410 | 348 | 927 | 913 | 1,615 |
| No costs | 41 | 156 | 215 | 432 | 496 | 1,075 | 1,327 | 2,029 |

**Table S11.** Gross margins per year, per dry sheep equivalent (DSE), and per grazed area for the *Baseline*, low (0.3%) and high (6%) antecedent surface SOC (0-30 cm).

| **SOC level** | **Emission costs** | **WA (R1), 353 mm/year** | | **SA (C2), 447 mm/year** | | **VIC (C3), 657 mm/year** | | **VIC (R4), 734 mm/year** | |
| --- | --- | --- | --- | --- | --- | --- | --- | --- | --- |
| **Low Price** | **High Price** | **Low Price** | **High Price** | **Low Price** | **High Price** | **Low Price** | **High Price** |
| **Gross margin ($/year)** | | | | | | | | | |
| High SOC | High costs | -31,899 | 82,276 | 97,113 | 284,658 | -1,352 | 345,552 | 282,723 | 591,537 |
| Low costs | 26,738 | 140,913 | 166,739 | 354,284 | 168,280 | 515,184 | 458,307 | 767,121 |
| No costs | 62,677 | 176,853 | 209,413 | 396,958 | 272,248 | 619,152 | 565,923 | 874,737 |
| *Baseline* | High costs | 15,066 | 129,241 | 147,413 | 334,958 | 71,326 | 418,230 | 322,523 | 631,337 |
| Low costs | 43,276 | 157,451 | 185,853 | 373,398 | 206,189 | 553,093 | 473,431 | 782,245 |
| No costs | 60,566 | 174,741 | 209,413 | 396,958 | 288,847 | 635,751 | 565,923 | 874,737 |
| Low SOC | High costs | 38,453 | 153,181 | 166,413 | 353,958 | 100,293 | 447,197 | 356,823 | 665,637 |
| Low costs | 54,573 | 169,301 | 193,073 | 380,618 | 214,621 | 561,525 | 480,885 | 789,699 |
| No costs | 64,453 | 179,181 | 209,413 | 396,958 | 284,693 | 631,597 | 556,923 | 865,737 |
| **Gross margin** **per dry sheep equivalent ($/DSE)** | | | | | | | | | |
| High SOC | High costs | -13 | 34 | 24 | 70 | 0 | 35 | 28 | 59 |
| Low costs | 11 | 58 | 41 | 87 | 17 | 52 | 46 | 77 |
| No costs | 26 | 72 | 52 | 98 | 27 | 62 | 57 | 87 |
| *Baseline* | High costs | 6 | 53 | 36 | 83 | 7 | 42 | 32 | 63 |
| Low costs | 18 | 65 | 46 | 92 | 21 | 55 | 47 | 78 |
| No costs | 25 | 72 | 52 | 98 | 29 | 64 | 57 | 87 |
| Low SOC | High costs | 16 | 63 | 41 | 87 | 10 | 45 | 36 | 67 |
| Low costs | 22 | 69 | 48 | 94 | 21 | 56 | 48 | 79 |
| No costs | 26 | 73 | 52 | 98 | 28 | 63 | 56 | 87 |
| **Gross margin per grazed area ($/ha)** | | | | | | | | | |
| High SOC | High costs | -32 | 82 | 112 | 329 | -2 | 576 | 643 | 1,344 |
| Low costs | 27 | 141 | 193 | 410 | 280 | 859 | 1,042 | 1,743 |
| No costs | 63 | 177 | 242 | 459 | 454 | 1,032 | 1,286 | 1,988 |
| *Baseline* | High costs | 15 | 129 | 170 | 387 | 119 | 697 | 733 | 1,435 |
| Low costs | 43 | 157 | 215 | 432 | 344 | 922 | 1,076 | 1,778 |
| No costs | 61 | 175 | 242 | 459 | 481 | 1,060 | 1,286 | 1,988 |
| Low SOC | High costs | 38 | 153 | 192 | 409 | 167 | 745 | 811 | 1,513 |
| Low costs | 55 | 169 | 223 | 440 | 358 | 936 | 1,093 | 1,795 |
| No costs | 64 | 179 | 242 | 459 | 474 | 1,053 | 1,266 | 1,968 |

**Table S12.** Relative change in pasture productivity, SOC stocks, GHG emissions and supplementary feed intake for cell grazing regimes and pasture species. Relative change was quantified as the difference between emanating from each intervention and the corresponding *Baseline*.

| **Parameter** | **WA (R1), 353 mm/year** | | **SA (C2), 447 mm/year** | | **VIC (C3), 657 mm/year** | | **VIC (R4), 734 mm/year** | |
| --- | --- | --- | --- | --- | --- | --- | --- | --- |
| **Average monthly pasture growth rate (kg/ha/day)** | | | | | | | | |
| **Cell grazing regime** |  | |  | |  | |  | |
| Adaptive grazing | +4 | | +5 | | +6 | | +6 | |
| Low intensity long rests | +3 | | +4 | | +4 | | +4 | |
| High intensity short rests | +3 | | +3 | | +4 | | +4 | |
| Low intensity short rests | +3 | | +3 | | +4 | | +4 | |
| High intensity long rests | +2 | | +2 | | +3 | | +3 | |
| **Pasture type** |  | |  | |  | |  | |
| More productive mix | +1 | | +1 | | 0 | | +1 | |
| Least productive mix | -3 | | -4 | | -10 | | -5 | |
| Set stocked (*Baseline*) | **9** | | **10** | | **16** | | **19** | |
| **Mean annual pasture production (kg/ha/yr)** | | | | | | | | |
| **Cell grazing regime** |  | |  | |  | |  | |
| Adaptive grazing | +1,318 | | +1,615 | | +2,435 | | +1,941 | |
| Low intensity long rests | +1,166 | | +1,390 | | +1,498 | | +1,526 | |
| High intensity short rests | +1,082 | | +1,279 | | +1,437 | | +1,309 | |
| Low intensity short rests | +1,015 | | +1,269 | | +1,397 | | +1,211 | |
| High intensity long rests | +845 | | +1,039 | | +1,255 | | +1,126 | |
| **Pasture type** |  | |  | |  | |  | |
| More productive mix | +352 | | +315 | | +196 | | +253 | |
| Least productive mix | -1,136 | | -1,305 | | -3,508 | | -1,855 | |
| **Set stocked (*Baseline*)** | **3,386** | | **3,608** | | **5,808** | | **7,045** | |
| **Relative SOC (t C/ha) 0-30 cm** | | | | | | | | |
| **Cell grazing regime** |  | |  | |  | |  | |
| Adaptive grazing | +24 | | +13 | | +42 | | +24 | |
| High intensity long rests | +20 | | +12 | | +35 | | +21 | |
| Low intensity long rests | +16 | | +7 | | +33 | | +15 | |
| High intensity short rests | +12 | | +2 | | +32 | | +8 | |
| Low intensity short rests | +4 | | -5 | | +29 | | +3 | |
| **Pasture type** |  | |  | |  | |  | |
| More productive mix | +2 | | +3 | | +4 | | +3 | |
| Least productive mix | -7 | | -15 | | -41 | | -23 | |
| **Set stocked (*Baseline*)** | **3** | | **10** | | **37** | | **21** | |
| **Annual net GHG emissions (t CO₂e/yr)** | | | | | | | | |
| **Cell grazing regime** | |  | |  | |  | |  |
| Adaptive grazing | | -387 | | -381 | | -1,133 | | -523 |
| High intensity long rests | | -336 | | -241 | | -926 | | -332 |
| Low intensity long rests | | -340 | | -274 | | -1,002 | | -359 |
| High intensity short rests | | -220 | | -145 | | -632 | | -139 |
| Low intensity short rests | | -248 | | -166 | | -822 | | -218 |
| **Pasture type** | |  | |  | |  | |  |
| More productive mix | | +104 | | +99 | | +247 | | +114 |
| Least productive mix | | -54 | | -40 | | -72 | | -66 |
| Set stocked (*Baseline*) | | **466** | | **657** | | **2,252** | | **2,511** |
| **Average annual supplementary feed intake (kg/animal/yr)** | | | | | | | | |
| **Cell grazing regime** | |  | |  | |  | |  |
| Adaptive grazing | | +19 | | +19 | | -3 | | -6 |
| High intensity long rests | | -10 | | -8 | | +23 | | +27 |
| Low intensity long rests | | -11 | | -19 | | -4 | | -5 |
| Low intensity short rests | | -12 | | -24 | | -10 | | -11 |
| High intensity short rests | | -12 | | -25 | | -11 | | -12 |
| **Pasture type** | |  | |  | |  | |  |
| More productive mix | | -6 | | -28 | | +2 | | 0 |
| Least productive mix | | +25 | | +7 | | +89 | | +40 |
| Set stocked (*Baseline*) | | **24** | | **47** | | **19** | | **18** |

**Table S13.** Costs associated with livestock sales (commissions and levies) as well as land, pasture and stock management

| **Contant costs ($/year)** | **WA (R1), 353 mm/year** | **SA (C2), 447 mm/year** | **VIC (C3), 657 mm/year** | **VIC (R4), 734 mm/year** |
| --- | --- | --- | --- | --- |
| Land management costs | 25,000 | 7,883 | 18,455 | 13,000 |
| Pasture management costs | 100,047 | 52,160 | 232,419 | 105,748 |
| Stock management costs | 63,274 | 43,672 | 124,076 | 130,067 |
| Selling costs - low | 23,850 | 36,076 | 67,417 | 60,303 |
| ­ high | 29,116 | 44,914 | 83,872 | 74,855 |

**Table S14.** Annual supplementary feed costs ($/year) for cell grazing, pasture species diversity and antecedent soil organic carbon (SOC) levels

| **Treatment** | **WA (R1), 353 mm/year** | **SA (C2), 447 mm/year** | **VIC (C3), 657 mm/year** | **VIC (R4), 734 mm/year** |
| --- | --- | --- | --- | --- |
| **Pasture type** | | | | |
| *Baseline* | 25,351 | 57,176 | 82,412 | 54,000 |
| Least productive | 52,009 | 65,691 | 104,087 | 174,000 |
| More productive | 19,013 | 33,114 | 50,710 | 54,000 |
| **Antecedent SOC levels** | | | | |
| High SOC | 23,239 | 57,176 | 82,412 | 54,000 |
| Low SOC | 22,289 | 57,176 | 88,412 | 63,000 |
| **Cell grazing regimes** | | | | |
| Low intensity long rests | 13,798 | 34,062 | 70,412 | 39,000 |
| High intensity long rests | 14,860 | 47,444 | 51,412 | 45,000 |
| Low intensity short rests | 12,737 | 26,763 | 49,412 | 18,000 |
| High intensity short rests | 13,837 | 29,780 | 52,412 | 21,000 |
| Adaptive grazing | 45,640 | 80,289 | 73,412 | 66,000 |

**Table S15.** Annual GHG emission abatement costs ($/year) for cell grazing, pasture species diversity and initial soil organic carbon (SOC) levels

| **Treatment** | **WA (R1), 353 mm/year** | | **SA (C2), 447 mm/year** | | **VIC (C3), 657 mm/year** | | **VIC (R4), 734 mm/year** | |
| --- | --- | --- | --- | --- | --- | --- | --- | --- |
| **Low Price** | **High Price** | **Low Price** | **High Price** | **Low Price** | **High Price** | **Low Price** | **High Price** |
| **Pasture type** | | | | | | | | |
| *Baseline* | 17,708 | 46,600 | 24,966 | 65,700 | 87,818 | 231,100 | 95,418 | 251,100 |
| Least productive | 21,660 | 57,000 | 28,732 | 75,610 | 94,975 | 249,935 | 99,743 | 262,481 |
| More productive | 15,656 | 41,200 | 23,451 | 61,713 | 82,825 | 217,961 | 92,903 | 244,483 |
| **Antecedent SOC levels** | | | | | | | | |
| High SOC | 27,997 | 73,677 | 34,314 | 90,300 | 99,788 | 262,600 | 103,702 | 272,900 |
| Low SOC | 14,326 | 37,700 | 20,520 | 54,000 | 77,330 | 203,500 | 82,954 | 218,300 |
| **Cell grazing regimes** | | | | | | | | |
| Low intensity long rests | 4,788 | 12,600 | 14,554 | 38,300 | 49,742 | 130,900 | 81,776 | 215,200 |
| High intensity long rests | 4,940 | 13,000 | 15,808 | 41,600 | 52,630 | 138,500 | 82,802 | 217,900 |
| Low intensity short rests | 8,284 | 21,800 | 18,658 | 49,100 | 56,582 | 148,900 | 87,134 | 229,300 |
| High intensity short rests | 9,348 | 24,600 | 19,456 | 51,200 | 63,802 | 167,900 | 90,136 | 237,200 |
| Adaptive grazing | 3,002 | 7,900 | 10,488 | 27,600 | 44,764 | 117,800 | 75,544 | 198,800 |
